# Supplementary material for: Effect of Mg substitution on LaTi1−xMgxO3+δ catalysts for improving the C2 selectivity of the oxidative coupling of methane
Source: Royal Society of Chemistry journal article supplement (doi:10.1039/d0cy01783c), 2020-11-13
Supplement: d0cy01783c1.pdf [file d0cy01783c1.pdf]

## Electronic supplementary information

Effect of Mg substitution on  $\text{LaTi}_{1-x}\text{Mg}_x\text{O}_{3+\delta}$  catalysts for improving C2  
selectivity of the oxidative coupling of methane

Larissa de Bessa Lopes<sup>a</sup>, Luiz H. Vieira<sup>a</sup>, José Mansur Assaf<sup>b</sup>, Elisabete Moreira

Assaf<sup>\*a</sup>

<sup>a</sup> University of São Paulo, São Carlos Institute of Chemistry, Av. Trabalhador São-carlense, 400,  
13560-970 São Carlos, Brazil.

<sup>b</sup> Federal University of São Carlos, Rod. W. Luiz, km.235, São Carlos, SP, Brazil.

\*E-mail: [eassaf@iqsc.usp.br](mailto:eassaf@iqsc.usp.br)

## **1. Supplementary information on experimental**

### **Synthesis of pure oxide catalysts**

Pure oxide catalysts ( $\text{La}_2\text{O}_3$ ,  $\text{TiO}_2$  e  $\text{MgO}$ ) were prepared by the polymerized complex method. 0.2 moles of each cation precursor (lanthanum nitrate, titanium isopropoxide or magnesium nitrate) were added to 4 moles of ethylene glycol and 1 mol of anhydrous citric acid under constant stirring. The solution was stirred for 30 min at ambient temperature and then heated at 120 °C until full polymerization. The polymer was calcined at 300 °C for 2 h, macerated and calcined at 800 °C for 4 h.

### **XPS analyses**

The inelastic background of the La 3d, Ti 2p, Mg 2s, C 1s, and O 1s spectra was subtracted using Shirley's equation. The binding energy scale of the spectra was corrected using the C1s hydrocarbon group (284.8 eV). The atomic composition of the surface layer (<5 nm) was determined by the relative proportions of the areas of the spectra corrected by Scofield's atomic sensitivity factors, with an accuracy of  $\pm 5\%$ . The spectra were deconvolved using a Voigtian function, with Gaussian (70%) and Lorentzian (30%) combinations.

### **CO<sub>2</sub>-TPD analyses**

The catalysts samples (200 mg) were heated in Ar flow (50 mL.min<sup>-1</sup> and 10 °C.min<sup>-1</sup> heating rate) from 30 to 800 °C and then cooled to 30 °C. After this step, the samples were treated with CO<sub>2</sub> flow (30 mL.min<sup>-1</sup>) for 1 h and Ar flow (20 mL.min<sup>-1</sup>) for 30 min. Finally, the Ar flow was maintained for recording the CO<sub>2</sub>-TPD results, and the samples were heated at 5°C.min<sup>-1</sup> from 30°C to 800°C and held at this temperature until the curve returned to the baseline.

## **DRIFTS analyses**

The catalysts were heated in He flow (20 mL.min<sup>-1</sup>) up to 500 °C and held for 30 min; they were then cooled to 50 °C and kept under CO<sub>2</sub> flow (20 mL.min<sup>-1</sup>) for 30 min, followed by He flow (20 mL.min<sup>-1</sup>) for 15 min. The spectra were collected after this step, and the processes were repeated for the chemisorption at 300 and 500 °C. The background spectra at each temperature were obtained before the CO<sub>2</sub>-chemisorption. Data were treated by the Smooth and Kubelka Munk functions.

## 2. Supplementary information on results

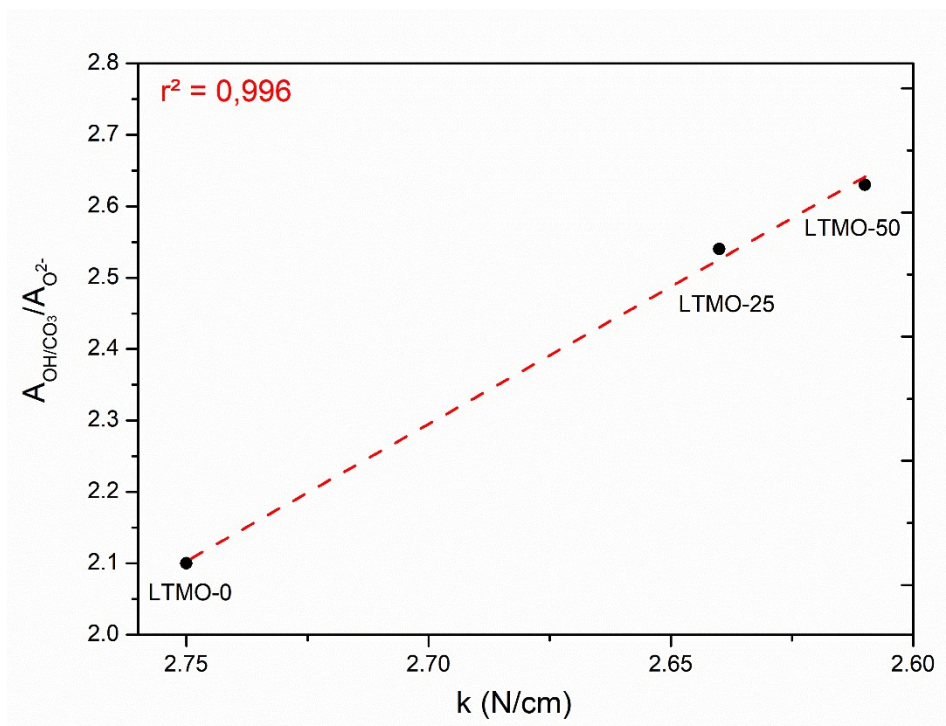

**Figure S1.** The ratio of hydroxyl/carbonate oxygen and lattice oxygen ( $A_{\text{OH}/\text{CO}_3}/A_{\text{O}_2^-}$ ) versus bond force constant. A linear fit was performed with  $r^2 = 0.996$ .

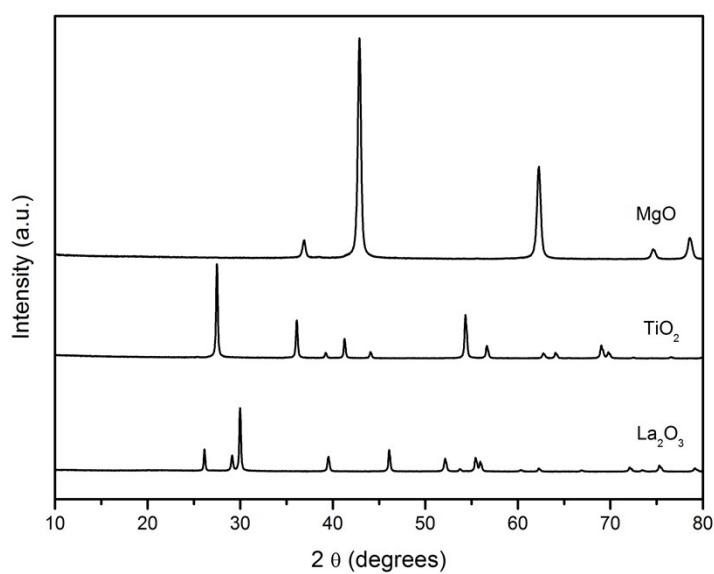

**Figure S2.** X-ray diffraction patterns of  $\text{La}_2\text{O}_3$ ,  $\text{TiO}_2$  and MgO catalysts.

The patterns for all pure oxide structures were verified by X-ray diffraction analysis (Fig. S1). Lanthanum oxide (PDF No. 05-0602) showed diffraction patterns corresponding to a hexagonal crystalline system and  $P-3m1$  space group. Titanium oxide (PDF No. 71-0650) was formed in a rutile crystalline structure (tetragonal,  $P42 / mnm$ ), and magnesium oxide (PDF No. 45-0946) was formed in a periclase crystalline structure (cubic,  $Fm -3m$ ).

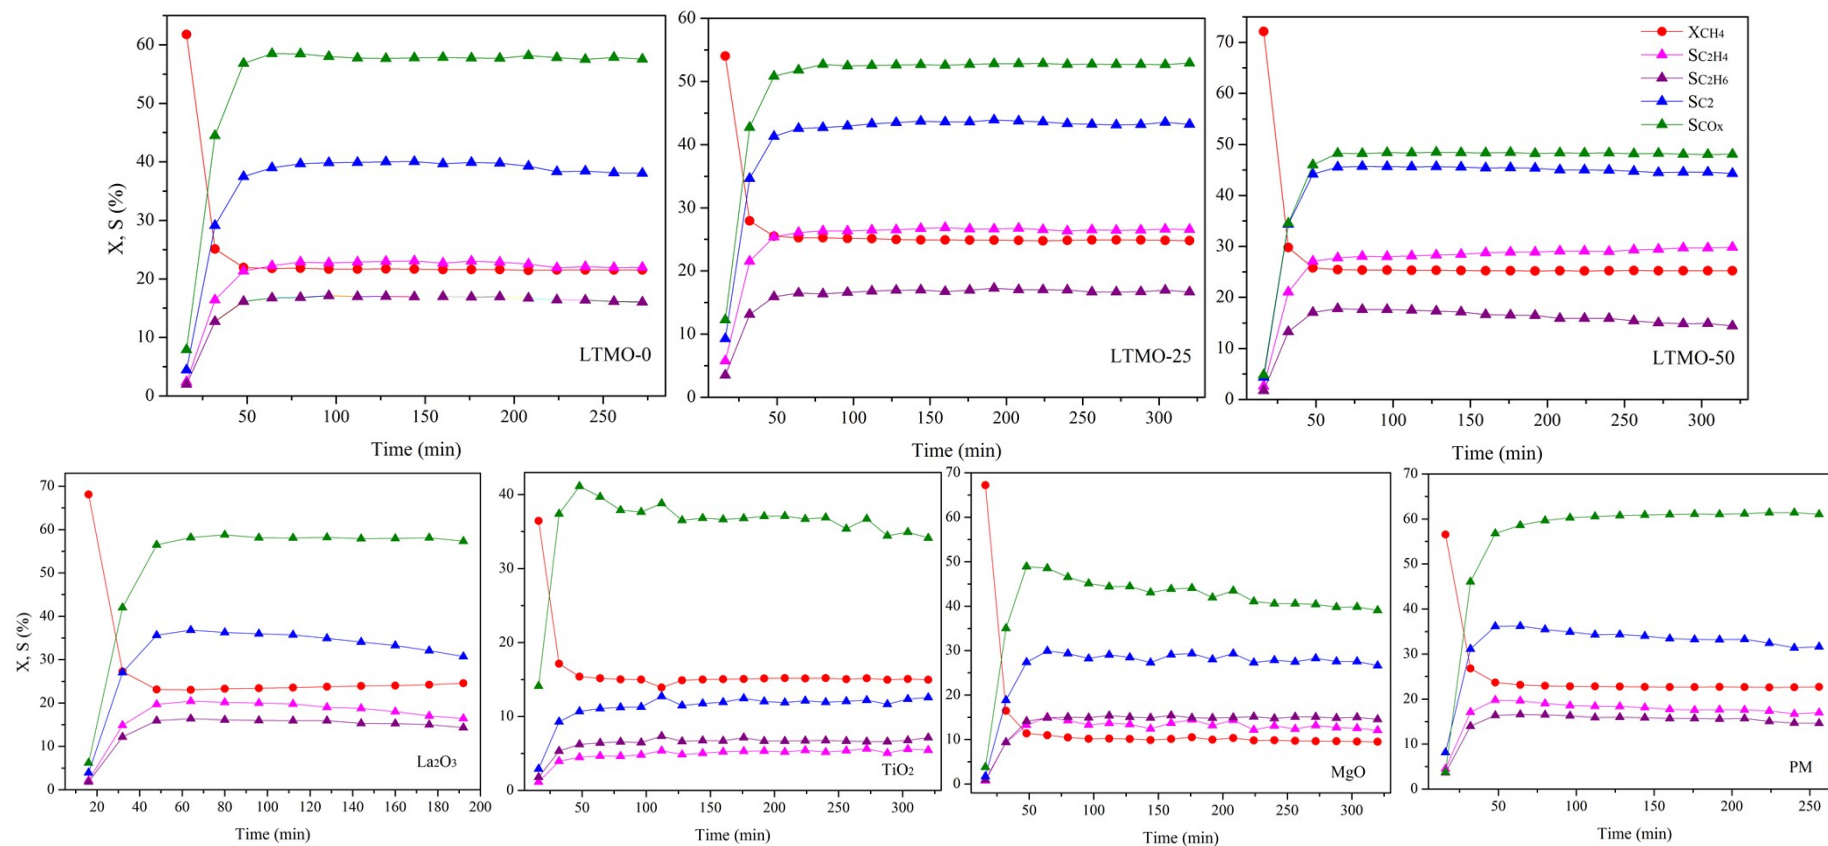

**Figure S3.** Methane conversion ( $X_{CH_4}$ ),  $CO_x$  selectivity ( $S_{CO_x}$ ),  $C_2H_4$  selectivity ( $S_{C_2H_4}$ ),  $C_2H_6$  selectivity ( $S_{C_2H_6}$ ) and  $C_2$  selectivity ( $S_{C_2}$ ) over the OCM reaction time for LTMO-0, LTMO-25, LTMO-50,  $La_2O_3$ ,  $TiO_2$ , MgO and PM. Reaction conditions:  $CH_4/O_2 = 8$ ,  $W = 45000 \text{ mL}_{cat}^{-1} \cdot h^{-1}$  and  $T = 800 \text{ }^\circ\text{C}$ .

**Table S1.** Catalytic performance of LTMO-50 catalyst and other perovskite structures of OCM literature.

| Catalysts                                                 | $X_{\text{CH}_4}$<br>(%) | $S_{\text{C}_2}$<br>(%) | $\text{C}_2\text{H}_4/\text{C}_2\text{H}_6$ | GHSV ( $\text{h}^{-1}$ ) | T ( $^\circ\text{C}$ ) | $\text{CH}_4/\text{O}_2$ | $S_{\text{BET}}$<br>( $\text{m}^2/\text{g}$ ) | Productivity                                                   |                                                                |
|-----------------------------------------------------------|--------------------------|-------------------------|---------------------------------------------|--------------------------|------------------------|--------------------------|-----------------------------------------------|----------------------------------------------------------------|----------------------------------------------------------------|
|                                                           |                          |                         |                                             |                          |                        |                          |                                               | $\text{mmol}_{\text{C}_2}\cdot\text{g}^{-1}\cdot\text{h}^{-1}$ | $\text{mmol}_{\text{C}_2}\cdot\text{m}^{-2}\cdot\text{h}^{-1}$ |
| LTMO-50                                                   | 17.3                     | 51.4                    | 0.97                                        | 30,000 <sup>a</sup>      | 800                    | 8                        | 5.0                                           | 68.2                                                           | 13.6                                                           |
| $\text{La}_2\text{Ti}_2\text{O}_7$ <sup>1</sup>           | 18                       | 32                      | 0.5                                         | 18,000 <sup>a</sup>      | 800                    | 4                        | 16.3                                          | 18.9                                                           | 1.2                                                            |
| $\text{LaAlO}_3$ <sup>2</sup>                             | 24                       | 44                      | 0.6                                         | 10,000                   | 800                    | 4                        | 3.0                                           | 4.4 <sup>b</sup>                                               | 1.5                                                            |
| $\text{LaFeO}_3$ <sup>2</sup>                             | 18                       | 19                      | 1.4                                         | 10,000                   | 800                    | 4                        | 3.0                                           | 1.5 <sup>b</sup>                                               | 0.5                                                            |
| $\text{LaNiO}_3$ <sup>2</sup>                             | 14                       | 2                       | 3                                           | 10,000                   | 700                    | 4                        | 3.3                                           | 0.1 <sup>b</sup>                                               | 0.03                                                           |
| $\text{BaSrTiO}_3$ <sup>3</sup>                           | 47                       | 29.5                    | -                                           | 6,000                    | 800                    | 2                        | 4.4                                           | 17.0                                                           | 3.9                                                            |
| $\text{MgBaSrTiO}_3$ <sup>3</sup>                         | 46.5                     | 43                      | -                                           | 6,000                    | 800                    | 2                        | 0.9                                           | 29.5                                                           | 32.7                                                           |
| $\text{SrTiO}_3$ <sup>4</sup>                             | 15                       | 62.6                    | 2                                           | 151,200                  | 850                    | 4                        | 1.5                                           | 115.3 <sup>b</sup>                                             | 76.8                                                           |
| $\text{SrTi}_{0.9}\text{Mg}_{0.1}\text{O}_3$ <sup>4</sup> | 24                       | 64                      | 1.3                                         | 151,200                  | 850                    | 4                        | 3.2                                           | 188.6 <sup>b</sup>                                             | 58.9                                                           |

a. WHSV ( $\text{mL}\cdot\text{g}^{-1}\cdot\text{h}^{-1}$ )

b. catalyst mass was calculated from catalyst volume using the following densities:  $\text{LaAlO}_3 = 6.52 \text{ g/cm}^3$ ;  $\text{LaFeO}_3 = 6.40 \text{ g/cm}^3$ ;  $\text{LaNiO}_3 = 6.93 \text{ g/cm}^3$ ;  $\text{SrTiO}_3 = 4.81 \text{ g/cm}^3$ .

### 3. References for supplementary material

- 1 J. Xu, Y. Zhang, X. Xu, X. Fang, R. Xi, Y. Liu, R. Zheng and X. Wang, *ACS Catal.*, 2019, **7**, 4030–4045.
- 2 I. Kim, G. Lee, H. Bin Na, J. M. Ha and J. C. Jung, *Mol. Catal.*, 2017, **435**, 13–23.
- 3 Z. Fakhroueian, F. Farzaneh and N. Afrookhteh, *Fuel*, 2008, **87**, 2512–2516.
- 4 D. V. Ivanov, L. A. Isupova, E. Y. Gerasimov, L. S. Dovlitova, T. S. Glazneva and I. P. Prosvirin, *Appl. Catal. A Gen.*, 2014, **485**, 10–19.
